# Supplementary material for: β3-Adrenoceptor redistribution impairs NO/cGMP/PDE2 signalling in failing cardiomyocytes
Source: eLife. 2020 Mar 31;9:e52221. doi: 10.7554/eLife.52221 (PMC7138611; doi:10.7554/eLife.52221)
Supplement: Figure 1—source data 1. [file elife-52221-fig1-data1.xlsx]

## Sheet: MI's
Animal	Date Echo	Date Sac	BW on echo	BW	HW	LW	TL		IVSd (mm)	LVIDd (mm)	LVPWd (mm)	IVSs	LVIDs (mm)	LVPWs	HR	Diastolic Volume	Systolic Volume	Stroke Vol	FS %	EF %	LV Mass (Corrected) (mg)	Notes		HW/TL	HW/BW	HW/(TL^3)	LW/BW	LW/(TL^3)
16W MI9	2014-03-10			574	2.91	3.29			0.9	11.64	3.21	1.57	9.7	3.88		786.303	527.993	258.31	16.6667	32.8512	1962.7			#DIV/0!	5.06969	#DIV/0!	5.73171	#DIV/0!
16W MI12	2014-03-10			599	1.72	1.96			2.36	11.21	2.64	2.5	7.57	3.28		724.531	304.572	419.958	32.471	57.9628	2401.44			#DIV/0!	2.87145	#DIV/0!	3.27212	#DIV/0!
16W MI2	2014-03-24			534	2.1	2.03	49.03		1.46	11.97	1.82	2.99	8.03	2.26		835.456	347.504	487.952	32.9156	58.4054	1542.86			42.8309	3.93258	0.017817	3.8015	0.0172231
16W MI1	2014-03-24		501	510	2.06	1.81	48.68		0.72	11.42	2.15	1.11	8.29	4.5		754.377	373.065	381.312	27.4081	50.5467	1203.55			42.3172	4.03922	0.0178573	3.54902	0.0156901
16W MI6	2014-03-10		519	531	1.82	1.79	47.93		1.86	10.22	1.49	2.31	6.71	3.43		592.095	232.139	359.956	34.3444	60.7937	1205.8			37.972	3.4275	0.0165291	3.371	0.0162566
16W MI11	2014-03-10		565	656	2.25	2.37	49.25		1.97	9.92	2.6	2.6	7.11	3.66		554.654	264.561	290.093	28.3266	52.3016	1740.51			45.6853	3.42988	0.0188349	3.6128	0.0198395
16W MI10	2014-04-07		545	752	2.06	1.93			1.15	10.22	2.71	1.15	8.33	3.86		592.095	377.08	215.015	18.4932	36.3143	1452.17
16W MI5	2014-04-07		713						1.65	10.66	1.79	1.57	8.73	3.15		649.272	418.452	230.82	18.1051	35.5506	1340.99
16W MI7	2014-04-07		493	514	1.64	1.65	47.75		0.94	10.72	2.28	1.34	7.71	3.75		657.277	317.329	339.948	28.0784	51.7206	1244.18
16W MI15	2014-04-07		566						1.54	10.82	2.16	3.42	6.35	3.49		670.731	204.838	465.893	41.3124	69.4604	1511.72
16W MI13	2014-04-07		780	846	2.08	2.06	47.95		1.74	9.64	2.51	2.06	5.78	3.79		520.838	165.245	355.593	40.0415	68.2732	1502.83
16w MI 45 (1, CG60663)	2014-10-07		460	498	1.55	1.66	43.01		2.18	8.29	1.81	2.22	5.94	2.73	356	374.505	176.83		28.455	53	1077.36	good infarct		36.0381	3.11245	0.0194815	3.33333	0.0208641
16w MI 46 (2)	2014-10-07		472	487	2.06	2.07	46.08		1.96	8.66	1.96	3.28	5.55	2.58	287	410.86	150.995		35.885	63.245	1125.84			44.7049	4.22998	0.0210538	4.25051	0.021156
16w MI 1 CG60666	2014-10-08	2014-10-09	615	628	2.6	1.21	47		1.82	9.05	2.08	2.99	6.35	2.81	346	453.675	204.9		29.8	54.71	1206.7	Smaller infarct but is transmural		55.3191	4.14013	0.0250426	1.92675	0.0116545
16w MI 2 CG63430	2014-10-08	2014-10-10	632	635	2.84	1.78	47		2.63	8.84	1.9	3.77	5.48	3.05	368	429.82	148.985		37.985	65.49	1437.16	Good infarct		60.4255	4.47244	0.0273542	2.80315	0.0171446
16w MI 4 CG63428	2014-10-08	2014-10-15	532	543	2.13	1.1	46		2.54	8.2	2.18	2.37	6.34	2.99	432	363.91	204.385		22.62	43.835	1351.46	very good infarct		46.3043	3.92265	0.021883	2.02578	0.0113011
16w MI 40	2014-10-14	2014-10-15	578	584	1.78	1.68	44.23		1.93	9.43	3.25	2.68	5.93	4.96	386	496.08	176.75		37.21	64.62	1917.37	good infarct		40.2442	3.04795	0.0205717	2.87671	0.0194159
16w MI 42 2	2014-10-14	2014-10-20	466	477	2.01	4.09	42.2		1.57	9.09	3.58	1.75	6.57	4.78	288	457.845	221.445		27.695	51.6	1796.64	good infarct		47.6303	4.21384	0.026746	8.57442	0.0544234

## Sheet: AMCs
Animal	Date Echo		Date Sac	BW on echo	BW	HW	LW	TL		IVSd (mm)	LVIDd (mm)	LVPWd (mm)	IVSs	LVIDs (mm)	LVPWs	Short/Long Axis	PA VTI (cm)	PA Vmax (mm/s)	PA Diam(mm)	HR	LVPW Vmax (MM/S)	AT (ms)	ET (ms)	AT/ET	LVPW (HR CORRECTED TO 300)	MV E Wave velocity (mm/s)	MV A Wave velocity (mm/s)		Diastolic Volume	Systolic Volume	Stroke Vol	FS %	EF %	LV Mass (Corrected) (mg)	SV (ml)	CO (ml/min)	CO corrected (ml/min/kg)		Notes		Beats	ms	Rate		HW/TL	HW/BW	HW/(TL^3)	LW/BW	LW/(TL^3)
16WAMC7	2012-08-15				560	1.49	1.75	50.7		1.9	7.74	2.09	4.19	2.41	3.94		4.76	1077.81	4.08	415	63.48	30	70	0.428571	45.8892				320.098	20.3706	299.727	68.863	93.6361	968.996	622.009	258.134	460.953		Sample to Amy Lewis						29.3886	2.66071	0.0114331	3.125	0.0134281
16WAMC6	2012-08-22				570	1.45	1.59	50.4		1.07	10.06	1.8	3	5.8	2.67		3.34	826	5.09	268	34.99	29	86	0.337209	39.1679	40	88	0.454545	571.971	166.559	405.412	42.3459	70.8798	963.362	679.284	182.048	319.383		Sample to Amy Lewis						28.7698	2.54386	0.011326	2.78947	0.0124195
16WAMC9	2012-08-30				574	1.56	1.77																			33	75	0.44											Sample to Amy Lewis							2.71777		3.08362
16WAMC8	2012-09-06				541	1.47	1.79	48.4		2.22	7.3	1.71	3.55	3.49	3.36		3.43	892	4.27	301	36.82	30	58	0.517241	36.6977	28	75	0.373333	280.734	50.5195	230.214	52.1918	82.0045	865.339	490.93	147.77	273.142								30.3719	2.71719	0.0129653	3.30869	0.0157876
16WAMC15	2012-09-12				561	1.58	1.66	51.6		1.67	8.69	2.12	3.28	4.58	3.05											31	73	0.424658	414.215	96.3472	317.868	47.2957	76.7398	1084.62					Sample to Amy Lewis						30.6202	2.8164	0.0115003	2.959	0.0120826
16WAMC21	2012-09-19				566	1.52	1.72	47.6		1.72	7.73	1.55	3.13	3.91	3.25											30	60	0.5	319.174	66.313	252.861	49.4179	79.2235	732.138											31.9328	2.68551	0.0140936	3.03887	0.0159481
16WAMC24	2012-09-26				622	1.52	2.06	49.8		2.08	8.91	1.76	3.45	4.68	3.32		3.39	830.35	4.48	402	50.32	38	93	0.408602	37.5522	33	79	0.417722	437.793	101.345	336.448	47.4747	76.8509	1150.15	534.103	214.71	345.192		Sample to Amy Lewis						30.5221	2.44373	0.0123071	3.3119	0.0166794
16WAMC10 (Chris)	2012-09-26				605	1.66		50.06		2.04	7.74	1.79	3.28	3.78	3.28		3.99	892	3.99	306	49.51	33	80	0.4125	48.5392				320.098	61.1765	258.921	51.1628	80.8882	914.115	498.641	152.584	252.205								33.1602	2.7438	0.0132323	0	0
16WAMC11 (Chris)	2012-09-26				582	1.62		50.37		1.2	8.8	2.13	3.07	4.67	3.47		2.31	858	4.21	315	48.88	23	55	0.418182	46.5524				425.92	100.839	325.081	46.9318	76.3244	929.419	321.4	101.241	173.954								32.162	2.78351	0.0126765	0	0
16WAMC26	2012-10-03				615	1.89	1.93	50.1		1.77	8.44	2.41	3.55	4.04	3.86		4.14	1048	3.56	344	46.23	36	82	0.439024	40.3169				388.236	71.6731	316.563	52.1327	81.5388	1186.69	411.879	141.686	230.385		Sample to Amy Lewis						37.7246	3.07317	0.0150296	3.13821	0.0153477
16WAMC12 (Chris)	2012-10-04				651	1.83		49		2	9.28	1.93	3.57	5.28	3.5		4.78	1063.6	4.34	365	51.97	30	80	0.375	42.7151				478.96	134.165	344.795	43.1034	71.9883	1268.67	706.768	257.97	396.268								37.3469	2.81106	0.0155547	0	0
16WAMC13	2012-10-04				610	1.71	1.65	49.8		2.18	8.67	1.98	3.96	4.84	3.21		3.6	1060	3.97	388	44.1	24	71	0.338028	34.0979				412.105	109.621	302.483	44.1753	73.3996	1230.09	445.403	172.816	283.306								34.3373			2.70492	0.0133597
16WAMC29	2012-10-18				572	1.46	2.11			1.74	8.99	1.95	3.09	5.23	2.95		5.63	1175	3.73	399	47.71	29	69	0.42029	35.8722				446.533	131.244	315.289	41.8242	70.6083	1105.35	614.888	245.34	428.916								#DIV/0!			3.68881	#DIV/0!
16WAMC30	2012-10-31				621	1.56	1.56	49.94																																					31.2375			2.51208	0.012525
16WAMC 31	2012-11-21				528	1.41	1.95	48.66																																					28.9766			3.69318	0.0169246
16WAMC40	2012-11-28				775	2.13	1.95																																									2.51613
16WAMC41	2012-12-06				602	1.57	1.83	51.36		2.54	7.36	2.29	4.06	3	4.21		4.83	839	4.01	323	54.84	50	102	0.490196	50.935				285.944	35	250.944	59.2391	87.7599	1190.06	609.685	196.928	327.123											3.03987
16WAMC42	2012-12-18				695	1.66	2.47	50.03																																								3.55396
