# Supplementary material for: β3-Adrenoceptor redistribution impairs NO/cGMP/PDE2 signalling in failing cardiomyocytes
Source: eLife. 2020 Mar 31;9:e52221. doi: 10.7554/eLife.52221 (PMC7138611; doi:10.7554/eLife.52221)
Supplement: Figure 2—source data 1. [file elife-52221-fig2-data1.xlsx]

## Sheet: whole cell response cGMP
Dates of experiments	control (56 cells/8 rats)	dates of experiments	MI cells (39 cells/6 rats)	Dates of experiments	control plus b1 and b2 blocker (22cells /4 rats)	Dates of experiments	control with SR59230A (17 cells/5 rats)	Dates of experiments	control with L-NAME (21 cells/5 rats)
2014-03-06	6.2	2014-03-14	4	2014-03-19	3.9	2014-11-19	0.69	2014-12-04	0.92235
	7.8		2.3		2.2		0.1		0.1				Explanation:
	4.2		2.4		2.2		0.1		0.1		0,1 = non-responding cells		whole cell FRET experiments in control cells and cells from myocardial infarction (MI)
	0.1		3.3		2.3		0.1		0.1
	0.1		0.9		0.1		0.1		0.1
2014-03-13	6.9		0.1		0.1		0.1		0.1
	2.4		0.1		0.1	2014-12-03	0.89	2014-12-10	1.05819
	4.1		0.1		0.1		0.1		1.20495
	0.1		0.1		0.1		0.1		0.1
2014-04-25	1.3	2014-08-29	2.52281	2014-03-21	5.3		0.1		0.1
	7.2		3.81126		6.2		0.1		0.1
	5.4		2.25488		5.6	February 2020 day 1 Peter new	0.0654103		0.1
	9.2		1.85987		5		0.138203		0.1
	0.1		1.16159		5.8	February 2020 day 2 Peter new	0.0609747		0.1
	0.1		0.1		0.1		0.19088	February 2020 day 1 Peter	0.20889
	0.1		0.1		0.1	February 2020 day 3 Peter new	0.14098		0.110705
	0.1		0.1		0.1		0.246986	February 2020 day 2 Peter new	0.455394
	0.1		0.1	2015-05-02	6.5				0.163414
	0.1		0.1		4.2			February 2020 day 3 Peter new	0.160808
2014-05-01	2.6		0.1		4.1				0.0764949
	5	2014-08-21	0.786682		5				0.0166819
	7		0.421247	2014-06-13	0.1
	0.1		2.19721
	0.1		0.957862
2015-06-13	1.9		0.625031
	3.5		0.1
	0.1		0.1
	0.1		0.1
	0.1		0.1
2015-06-18	4.9		0.1
	4	2014-08-15	0.907415
	4.7		0.1
	6.1		0.1
	0.1		0.1
	0.1	2014-12-12	1.69043
2014-06-27	5		1.10117
	0.1	2014-11-28	0.688812
	0.1		1.06578
2014-08-20	0.826605		2.3
	0.782804
	1.00218
	0.834273
	0.889833
	0.81206
	1.24446
	0.1
	0.1
	0.1
	0.1
2014-09-03	2.78425
	2.13073
	2.55441
	3.10507
	2.11824
	3.43521
	0.754881
