# Supplementary material for: β3-Adrenoceptor redistribution impairs NO/cGMP/PDE2 signalling in failing cardiomyocytes
Source: eLife. 2020 Mar 31;9:e52221. doi: 10.7554/eLife.52221 (PMC7138611; doi:10.7554/eLife.52221)
Supplement: Figure 3—source data 1. [file elife-52221-fig3-data1.xlsx]

## Sheet: Tabelle1
rat - date of experiment	PDE1 control (cells 11/ 4 rats)	rat - date of experiment	PDE1 MI (9 cells/ 3 rats)	rat - date of experiment	PDE2 control (18 cells/5 rats)	rat - date of experiment	PDE2 MI (17 cells / 4 rats)	rat - date of experiment	PDE3 control (11 cells /4 rats)	rat - date of experiment	PDE3 MI (10 cells / 4 rats)	rat - date of experiment	PDE5 control (11 cells / 4 rats)	rat - date of experiment	PDE5 MI (13 cells / 4 rats)	rat - date of experiment	IBMX control (59 cells /17 rats)	rat - date of experiment	IBMX MI (41 cells /14 rats)
rat1 PDE1 control	0.1	rat 1 PDE1 MI	1.78977	rat 1 PDE2 control	2.41811	rat 1 PDE2 MI	8.60402	rat 1 PDE3 control	0.956231	rat 1 PDE3 MI	2.73833	rat 1 PDE5 control	1.983	rat 1 PDE5 MI	4.88749	rat 1 PDE2 control	2.92535	rat 1 PDE2 MI	12.7343			MI = myocardial infarction
	1		1.66678		2.78832		10.9046		1.56905		4.43154		3.0014		2.98411		4.7671		11.17			Explanation: whole cell FRET measurement values atop ISO response
	1.96815		3.26948	rat 2 PDE2 control	3.19257		1.99805		0.874085	rat 2 PDE3 MI	1.76781	rat 2 PDE5 control	2.74181		5.04847	rat1 PDE1 control	4.63048		3.45993
rat2 PDE1 control	0.1	rat 2 PDE1 MI	0.1		3.59989	rat 2 PDE2 MI	3.98532	rat 2 PDE3 control	2.11063		2.01853		1.05633		5.70388		2.42023	rat 1 PDE1 MI	2.74414
	1.22831		0.1		3.24966		8.16801		3.20253		2.50201	rat 3 PDE5 control	4.86214	rat 2 PDE5 MI	3.1		3.60927		3.30785
	1.73394	rat 3 PDE1 MI	1.53	rat 3 PDE2 control	1.69919		1.27259	rat 3 PDE3 control	1.22577	rat 3 PDE3 MI	0.754887		2.13771		2.5	rat 1 PDE3 control	3.83279		12.3021
rat3 PDE1 control	1.64198		0.1		2.22142	rat 3 PDE2 MI	1.3		0.1		1.0822		3.32585		1.1		3.50765	rat 2 PDE1 MI	1.47014
	0.993028		0.1		1.07601		1.1		0.1		1.70169	rat 4 PDE5 control	2.28367	rat 3 PDE5 MI	2.1		5.14262		1.56333
	1.00218		0.1		1.05509		1.5	rat 4 PDE3 control	1.5768	rat 4 PDE3 MI	0.1		2.90132		1.5	rat 2 PDE3 control	5.23946	rat 2 PDE5 MI	4.36029
rat4 PDE1 control	1.35452				1.73465		4.5		0.1		0.1		0.1	rat 4 PDE5 MI	3.1232		4.31132		3.30532
	1.04492				3.40374		3.4		1.1				2.211		3.245	rat 3 PDE3 control	4.78112		1.41802
				rat 4 PDE2 control	0.930322		3.1								2.17223		5.07625	rat 4 PDE3 MI	1.22942
					1.70767		2.1								1.1223		3.39995	rat3 PDE1 MI	12.606
					1.29114	rat 4 PDE2 MI	4.2451									rat 4 PDE3 control	4.18079		12.9519
					1.34001		3.4821										5.93433		1.47014
					0.895117		2.217										2.40083		3.30532
				rat 5 PDE2 control	3.56196		3.147									rat2 PDE2 control	3.97949	rat2 PDE2 MI	3.19257
					2.41811												4.32432		15.774
																	12.4143		1.60629
																rat2 PDE1 control	15	rat 1 PDE3 MI	5.5238
																	1.91423		6.44
																	3.67925	rat 1 PDE5 MI	5.98052
																rat 3 PDE2 control	2.6242		3.34516
																	3.04044		6.20655
																	2.43323		12.9714
																	1.5549	rat 2 PDE3 MI	6.73042
																	2.81982		4.12224
																	7.04323		4.6231
																rat 4 PDE2 control	3.0386	rat 3 PDE5 MI	5.3
																	2.62503		4.22314
																	4.51451	rat 3 PDE2 MI	4.2514
																	2.06842		4.1123
																	1.44037		3.2015
																rat3 PDE1 control	3.01111		6.245
																	2.42023		4.2341
																	4.64055		4.52341
																rat5 PDE2	4.7671		4.14523
																	3.11736	rat 4 PDE2 MI	6
																rat 1 PDE5 control	5.10795		5.213
																	4.5128		4.52
																rat 2 PDE5 control	5.80367		4.73234
																	2.77863
																rat 3 PDE5 control	7.12688
																	2.83946
																	6.42315
																rat 4 PDE5 control	3.98851
																	4.97008
																	2.01186
																	4.87814
																rat4 PDE1 control	5.32024
																	2.02151
																	7.42551
																	4.10525
																	4.08987
																	3.94129
																	1.86775
																	4.54612
																	6.53649
																	5.9
