# Supplementary material for: β3-Adrenoceptor redistribution impairs NO/cGMP/PDE2 signalling in failing cardiomyocytes
Source: eLife. 2020 Mar 31;9:e52221. doi: 10.7554/eLife.52221 (PMC7138611; doi:10.7554/eLife.52221)
Supplement: Figure 4—figure supplement 1—source data 1. [file elife-52221-fig4-figsupp1-data1.xlsx]

## Sheet: Application Region Response 
Explanation: cGMP local signal in T-tubule and crest after control cells were treated with a TAT scrambled or with a caveolin 3 scaffolding domain distrupting peptide
	TAT- Scram			TAT-C3SD
	T-tubule	Crest		T-tubule	Crest
1	2.62231	3.72201		3.96763	18.8118
2	8.08213	2.81068		2.65518	9.2586
3	6.18258	2.1956		0.1	0.732391
4	4.98364	0.1		0.1	0.760339
5	0.1	0.1		4.9369	0.1				2020-01-22
6	7.4805	0.624723		18.3154	4.34841				2020-01-27
7	19.002	2.15415		10.8376	7.60762				2020-02-05
8	4.23678	0.291149		3.18901	6.50046				2020-02-17
9		0.549928		7.80004	9.21778				1 rat 2020
10		0.34193		2.4566	6.9452				2 rat 2020
		1.06443		3.52782	1.44322				3 rat 2020
				0.679206	0.93681

## Sheet: Zonal Response
TAT- Scram
Tubule						Crest
1	2	3	4	5		1	2	3	4	5
1.24468	1.99572	2.62231	2.20824	1.35887		2.27782	3.27199	3.72201	3.33224	2.47521
6.67886	7.67318	8.08213	7.96095	7.40087		2.03212	2.47006	2.81068	2.56955	2.46699
0.879345	1.15698	6.18258	3.28295	1.11562		0.706039	1.52473	2.1956	1.62904	1.4109
2.27498	3.77909	4.98364	3.89174	2.8706		-0.496944	-0.994152	-0.536234	-1.03091	-0.566336
-0.627984	-0.823146	-1.0083	-0.620831	-0.614382		-0.188206	-0.0557425	-0.0177597	0.108837	0.0543218
5.97729	6.43525	7.4805	7.10874				0.855302	0.624723	1.74221	1.7713
2.30008	5.21248	19.002	10.9851			-0.40188	0.3841	2.15415	1.18244
TAT-C3SD
Tubule						Crest
1	2	3	4	5		1	2	3	4	5
0.0130701	1.97816	3.96763	3.57733	3.30898		-0.202087	-0.0574105	18.8118	1.10971	-5.15808
1.79648	1.96798	2.65518	2.35711	2.13312		7.5947	8.57142	9.2586	9.01716	8.92293
-0.314181	-0.349465	-0.429975	-0.492022	-0.0337955		0.0978773	0.330748	0.732391	0.696917	0.488355
-0.109803	-0.23041	-0.184433	-0.273193	-0.461307		0.269973	0.469837	0.760339	0.755762	0.482015
2.36621	4.18386	4.9369	4.98089	3.8262		-0.509488	-0.860451	-0.816275	-1.25368	-1.1953
	5.34855	18.3154	11.8744	10.6459		0.390369	1.2348	4.34841	0.486173	-0.112587
1.95861	7.45962	10.8376	5.01301	2.93111		1.05648	2.97124	7.60762	6.22241
2.57405	2.82617	3.18901	3.57902	3.54931		2.55766	3.80229	6.50046	4.0167	1.30198
4.32276	7.36166	7.80004	7.64324	5.81577		1.03092	1.93946	9.21778	7.56254	2.76077
						-1.07742	-0.423718	6.9452	2.75127

## Sheet: post-may red de5
Tubule	Crest
1.40704	0.678985				2016-08-23
1.11381	2.10337				2016-06-30
1.58821	1.41207				2016-06-23
2.33464	1.53454
1.64909	1.60294
1.66484	0.605089
0.234419	1.94131
1.37279	0.268025
1.80885	1.15719
2.20025	0.384794
1.86464	1.99786
1.87723	1.28476
