# Supplementary material for: β3-Adrenoceptor redistribution impairs NO/cGMP/PDE2 signalling in failing cardiomyocytes
Source: eLife. 2020 Mar 31;9:e52221. doi: 10.7554/eLife.52221 (PMC7138611; doi:10.7554/eLife.52221)
Supplement: Figure 4—source data 1. [file elife-52221-fig4-data1.xlsx]

## Sheet: Tabelle1
	Control				Myocardial Infarction
dates of experiments	T-tubule (27 cells/4 rats)	dates of experiments	Crest (19 cells /4 rats)	dates of experiment	T-tubule (27 cells/7 rats)	dates of experiments	Crest (25 cells /7 rats)
	T-tubule		crest		T-tubule		crest			Explanation: local FRET ISO plus b1 and b2-AR blocker responses
2014-10-01	4.73944	2014-10-01	4.09745	2014-10-10	3.14106	2014-10-10	0.555044
	2.34647		0.1		0.1		2.38138
	1.77442		0.1		0.1		0.1
	1.11729		0.1		0.1		0.1
	0.1	2014-10-30	0.912743	2014-10-22	1.57752	2014-10-22	0.1
	0.1		0.1		0.1		0.1
2014-09-25	2.02856		0.1		0.1		0.1
	0.378524		0.1		0.1	2014-11-12	0.1
	2.65626	2014-10-23	0.1		0.1		0.1
	3.99118		0.1		0.1		0.1
	0.1		0.1	2014-11-12	0.725532		0.993869
	0.1		0.1		1.08313		0.1
2014-11-07	1.26402		0.1		0.1		0.1
	0.1		0.1		0.1	rat 1 Peter	0.678985
	0.1		0.1		0.1		2.10337
	0.1		0.1	rat 1 Peter	1.40704		1.41207
	0.1		0.1		1.11381		1.53454
	0.1	2014-11-20	0.1		1.58821	rat 2 Peter	1.60294
	0.1		0.1		2.33464		0.605089
2014-11-20	1.45825			rat 2 Peter	1.64909		1.94131
	1.28392				1.66484		0.268025
	0.1				0.234419	rat 3 Peter	1.15719
	0.1				1.37279		0.384794
	0.1			rat 3 Peter	1.80885		1.99786
	0.1				2.20025		1.28476
	0.1				1.86464
	0.1				1.87723
