# Supplementary material for: β3-Adrenoceptor redistribution impairs NO/cGMP/PDE2 signalling in failing cardiomyocytes
Source: eLife. 2020 Mar 31;9:e52221. doi: 10.7554/eLife.52221 (PMC7138611; doi:10.7554/eLife.52221)
Supplement: Figure 5—figure supplement 1—source data 1. [file elife-52221-fig5-figsupp1-data1.xlsx]

## Sheet: Tabelle1
	sGC beta1 subunit and Caveolin 3 staining in control cells and cells from myocardial infarction (MI)
date of staining	control (19 cells/3 rats )	date of confocal Claire images	Myocardial Infarction (15 cells / 2 rats)
14.07.	0.6	24.06.	0.34
	0.67		0.37			Explanation= Pearson correlation coefficient of whole cells
	0.53		0.5
	0.48		0.51
	0.45		0.48
	0.55		0.44
15.07.	0.5	26.08.	0.49
	0.55		0.43
	0.59		0.31
	0.59		0.47
	0.38		0.4
	0.31		0.52
	0.45		0.46
	0.59		0.5
	0.56		0.4
	0.59
	0.53
	0.44
	0.66
