# Supplementary material for: β3-Adrenoceptor redistribution impairs NO/cGMP/PDE2 signalling in failing cardiomyocytes
Source: eLife. 2020 Mar 31;9:e52221. doi: 10.7554/eLife.52221 (PMC7138611; doi:10.7554/eLife.52221)
Supplement: Figure 5—source data 1. [file elife-52221-fig5-data1.xlsx]

## Sheet: Tabelle1
	sGC alpha subunit and Cav3					sGC alpha subunit and a-actinin
dates of fixing cells	control (21 cells / 3 rats)		failing (22 cells /3 rats)		dates of fixing	control (19 cells/ 3 rats)	dates of fixing	failing (18 cells/ 3 rats)
2015-07-14	0.8397	2015-06-24	0.49183		2017-09-04	0.47419	2017-05-10	0.7127		Explanation: Pearson correlation coefficient of whole cells
	0.70747		0.21284			0.52584		0.74298
	0.77046		0.4136			0.36386		0.79462
	0.54541		0.51577			0.34476		0.73196
	0.49667		0.45973			0.39482		0.75327
	0.60584	2015-08-26	0.36812			0.40997		0.61849
2015-07-15	0.57684		0.57439			0.37965		0.84655
	0.73743		0.32097			0.38713		0.44429
	0.68764		0.36058		2017-07-10	0.46781	2017-05-17	0.25826
	0.63455	16.09.2015 fail	0.41757			0.31121		0.29805
	0.56652		0.4239			0.47169		0.18646
	0.45418		0.47525			0.40752		0.38924
16.09.2015 control	0.6633		0.49113			0.47712	2017-07-17	0.47876
	0.56098		0.62018		2017-07-21	0.53442		0.38796
	0.46922		0.57852			0.61468		0.41221
	0.60452		0.61813			0.46442		0.52458
	0.76677		0.55747			0.40439		0.67865
	0.76298		0.72803			0.36459		0.54855
	0.68589		0.7273			0.3593
	0.70374		0.71128
	0.682		0.53499
			0.71369
