# Supplementary material for: β3-Adrenoceptor redistribution impairs NO/cGMP/PDE2 signalling in failing cardiomyocytes
Source: eLife. 2020 Mar 31;9:e52221. doi: 10.7554/eLife.52221 (PMC7138611; doi:10.7554/eLife.52221)
Supplement: Figure 6—source data 1. [file elife-52221-fig6-data1.xlsx]

## Sheet: Tabelle1
control cells:							dates of the experiment	myocardial infarction cells:
dates of the experiment	control without CL316243 (26 cells/ 5 rats)	dates of the experiment	control with CL316243 (19 cells/3 rats)	dates of the experiment	control with BAY before CL316243 (15 cells /2 rats)			MI without CL316243 (19 cells /6 rats)	MI with CL316243 (26 cells /10 rats)	MI with BAY before CL316243 (22 cells/ 6 rats)
2017-10-20	83.0172	2017-10-20	77.1165	2017-12-06	88.9889			96.6768	68.0979	11.1676			Explanation= whole cell FRET experiments with cAMP sensor
	92.618		62.8946		84.1937			73.5668	72.4313	91.4244
	75.151		71.0544		88.6159			87.7476	53.0985	92.8158
	88.0454		85.2838		81.9935			84.4613	76.144
	97.2425		74.0004		84.9836				66.0656	101.764
	94.8064	2017-11-01	86.1877		80.7667				77.7128	97.4467
	90.0135		88.2543		74.9216				89.5134	94.6272
	83.2592		89.4029		92.8097
2017-11-01	86.5626		87.7698		93.2925			94.7765	90.099
	90.2682		80.8029	2017-12-07	100			87.5671	81.6179	92.6581
	91.3445		88.1035		100			100.532		115.599
	90.7596		60.6915		69.5284					88.5427
	84.6403		86.0214		79.6265			63.7073	68.5029	81.2145
2017-11-30	87.292		80.6644		82.4657			81.7599	94.706
	90.3888	2017-11-30	68.0275		79.7279			92.9568	96.8057	99.3419
	88.0629		65.4868	February 2020 Peter day 1	45.5847					93.0336
	91.3237		79.8843	February 2020 Peter day 2	95.5933					91.8353
2017-12-06	100		62.0718		87.7136			83.471	92.1387
	64.0314		96.9293	February 2020 Peter day 3	95.9193			102.722	83.8307
	92.6935	February 2020 Peter day 1	67.0938		67.2329			78.5631	94.3537	82.2118
	51.6998	February 2020 Peter day 2	90.203					79.6986		77.3135
2017-12-07	100		91.2624
	80.014	February 2020 Peter day 3	71.3948					95.1324	93.8012
	80.6009		54.8819					82.1847	97.008	62.8964
	97.5194		66.6975					128.79	100.739	80.5144
	88.26									87.1364
								95.3772	86.8592
								87.1629	75.1664
										61.0934
									73.256
										97.3954
										77.5078
									57.4728	72.9258
									103.675
									100.935
									57.2005
									79.6277
